# Supplementary material
Source: PubMed Central journal article supplement (PMC5800877)
Supplement: NIHMS936969-supplement-SM.pdf [file NIHMS936969-supplement-SM.pdf]

## Supplementary Materials for **Multicohort analysis reveals baseline transcriptional predictors of influenza vaccination responses**

HIPC-CHI Signatures Project Team\* and HIPC-I Consortium

\*Corresponding author. Email: pkhatri@stanford.edu (P.K.); rgottard@fredhutch.org (R. Gottardo); shenorr@technion.ac.il (S.S.S.-O.); john.tsang@nih.gov (J.S.T.); steven.kleinstein@yale.edu (S.H.K.)

Published 25 August 2017, *Sci. Immunol.* **2**, eaal4656 (2017)  
DOI: 10.1126/sciimmunol.aal4656

### **This PDF file includes:**

Fig. S1. Distribution of low (blue), moderate (purple), and high (red) responders in the discovery and validation cohorts.

Fig. S2. Genes that predict vaccination response in young individuals when comparing moderate responders versus low responders.

Fig. S3. Performance of genes significantly different in young high versus low responders.

Fig. S4. Baseline activity of the platelet activation (III) (M42) gene module is associated with influenza vaccination responses in young individuals.

Fig. S5. Baseline activity of the inflammatory response (M33) gene module is associated with influenza vaccination responses in young individuals.

Fig. S6. Validation of *GRB2*, *ACTB*, *MVP*, *DPP7*, *ARPC4*, *PLEKHB2*, and *ARRB1* as predictors of influenza vaccination response in the validation cohort (SDY80) after correction for cell subset proportions.

Table S1. Characteristics of the discovery and validation cohorts for young and older participants.

Table S2. Gene module activities that are associated with vaccination response in the discovery cohorts for older participants.

Table S3. Validation of gene modules that are associated with vaccination response in KEGG and Reactome and the modules defined in Obermoser *et al.* for young participants.

## SUPPLEMENTARY FIGURES

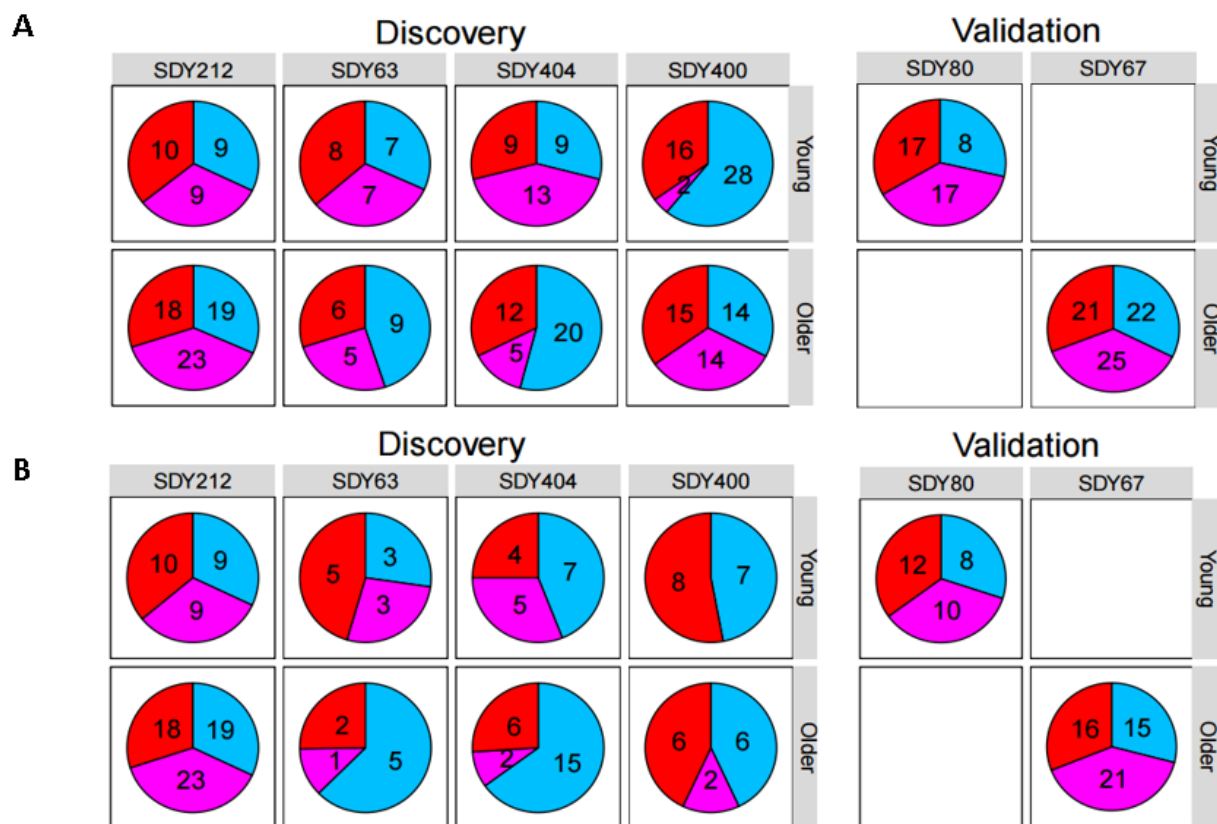

**Fig. S1. Distribution of low (blue), moderate (purple), and high (red) responders in the discovery and validation cohorts.** (A) All participants included in either the Young or Older groups (*i.e.*, in the unshaded areas from Fig 2). Note that these numbers also exclude the smaller batch from SDY67, which was not used in this study. (B) The subset of participants where transcriptional profiling data were available and used in the analysis. Note the enrichment of high and low responders in those with transcriptional profiling data (see Fig 2 for details.)

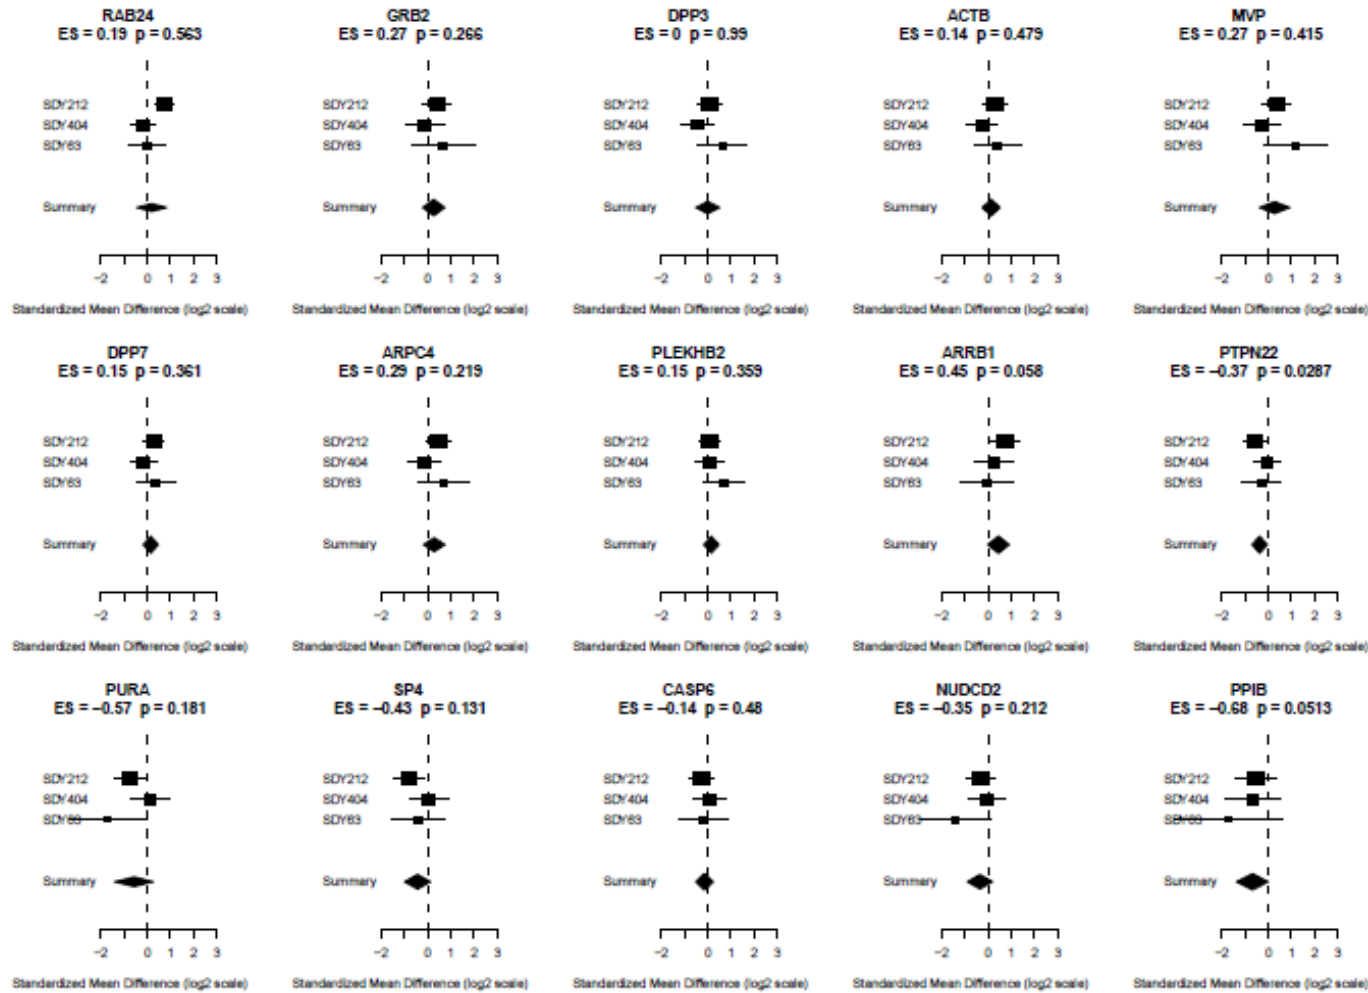

**Fig. S2. Genes that predict vaccination response in young individuals when comparing moderate responders versus low responders.** The x axes correspond to standardized mean difference, referred to as effect size (ES), between moderate and low responders, computed as Hedges' g, in log<sub>2</sub> scale. The size of the rectangles is inversely proportional to the standard error of mean (SEM) in the individual cohort. Whiskers represent the 95% confidence interval. The diamonds represent overall, mean difference for a given gene combined across the discovery cohorts. The width of the diamonds represents the 95% confidence interval of overall mean difference.

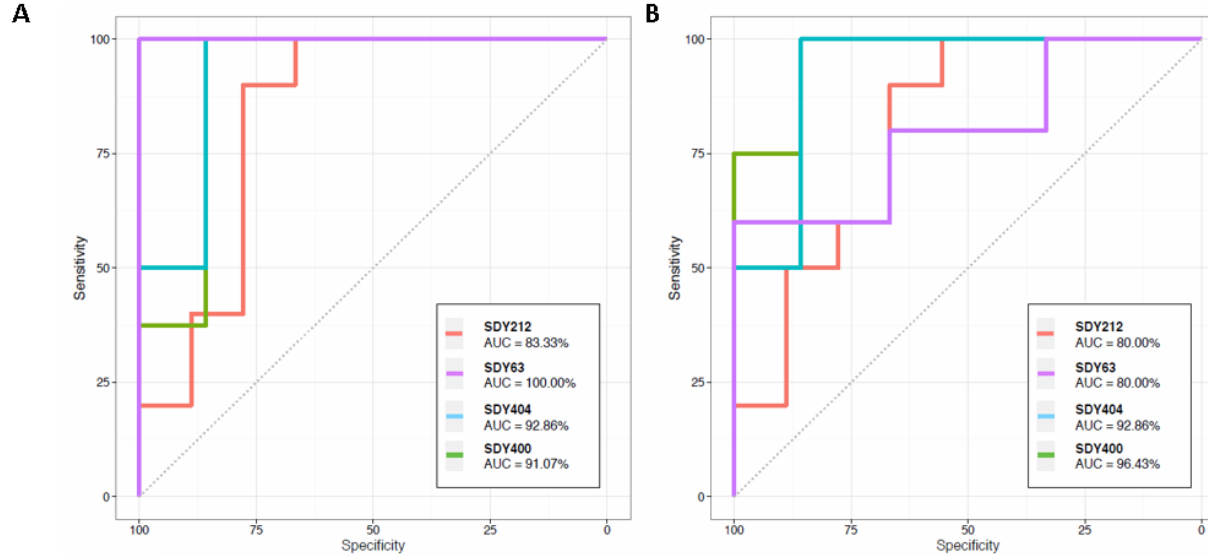

**Fig. S3. Performance of genes significantly different in young high versus low responders.** (A) The nine genes (*RAB24*, *GRB2*, *DPP3*, *ACTB*, *MVP*, *DPP7*, *ARPC4*, *PLEKHB2*, and *ARRB1*) with significantly increased expression, and (B) The six genes (*PTPN22*, *PURA*, *SP4*, *CASP6*, *NUDCD2*, and *PPIB*) with significantly reduced expression in young high responders. Each ROC curve summarizes the ability to classify individual participants as low vs. high responders within the indicated discovery cohort.

## platelet activation (III) (M42)

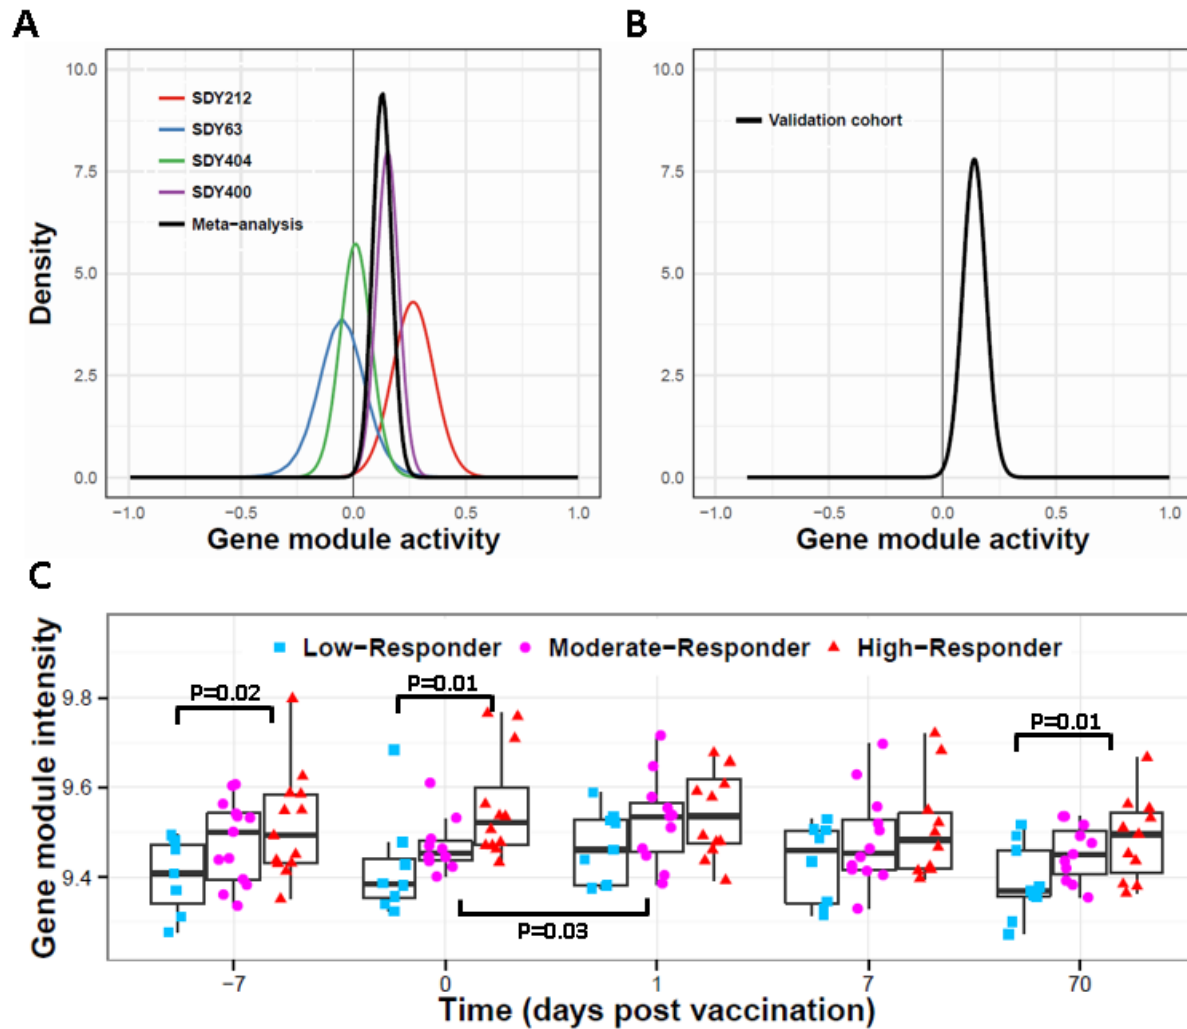

**Fig. S4. Baseline activity of the platelet activation (III) (M42) gene module is associated with influenza vaccination responses in young individuals. See Fig 7 for details.**

## Inflammatory response (M33)

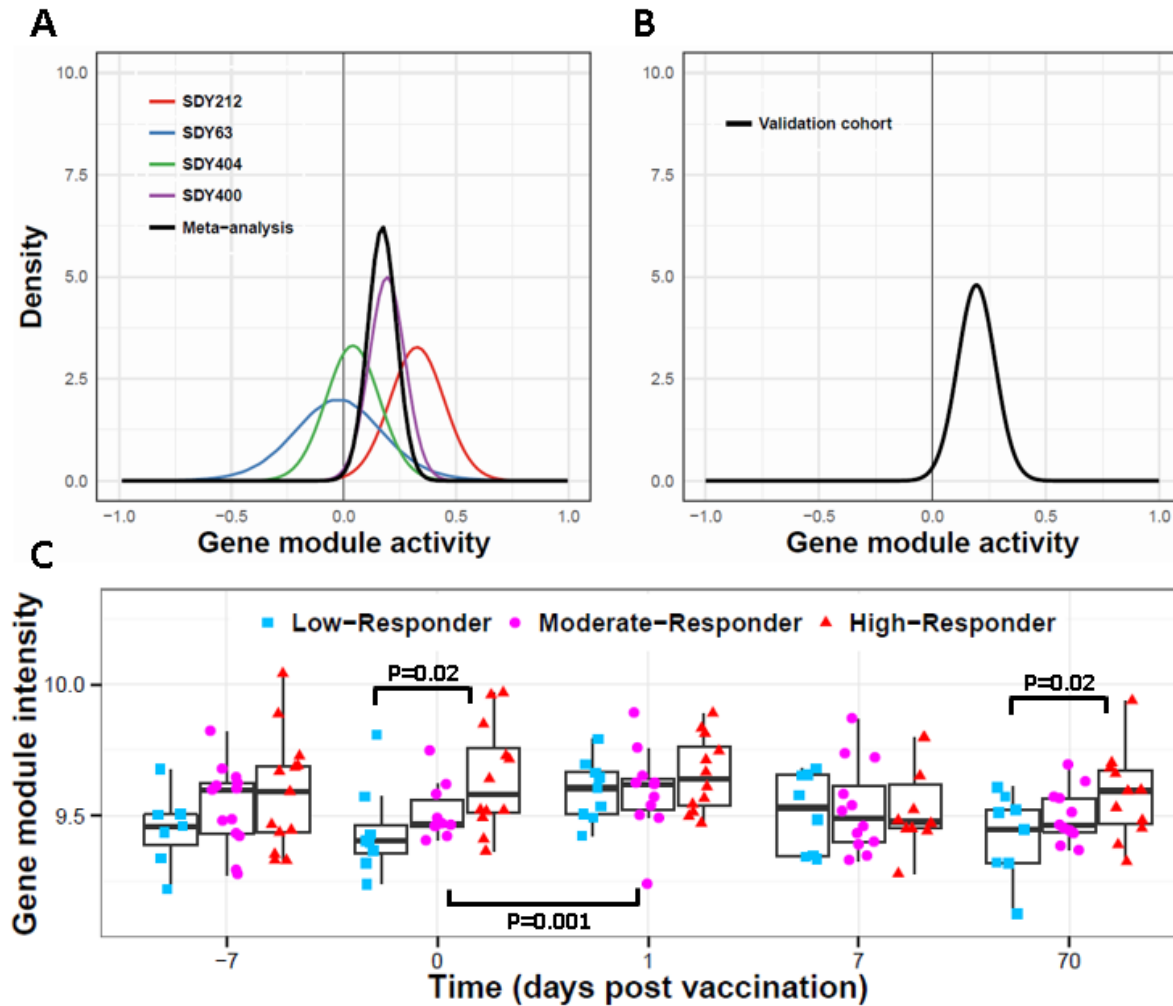

**Fig. S5. Baseline activity of the inflammatory response (M33) gene module is associated with influenza vaccination responses in young individuals. See Fig 7 for details.**

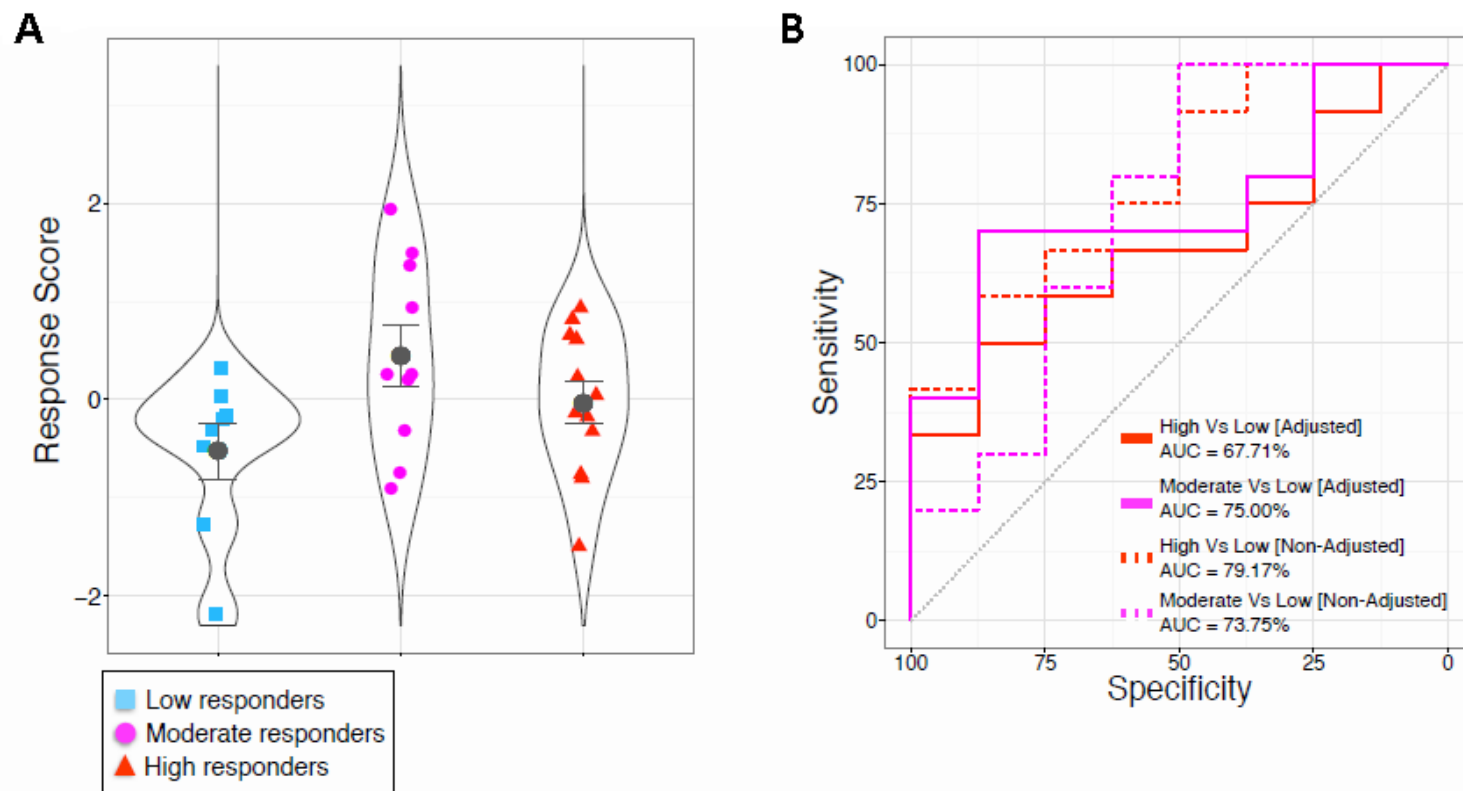

**Fig. S6. Validation of *GRB2*, *ACTB*, *MVP*, *DPP7*, *ARPC4*, *PLEKHB2*, and *ARRB1* as predictors of influenza vaccination response in the validation cohort (SDY80) after correction for cell subset proportions.** Note that two genes (*RAB24* and *DPP3*) identified as increased in high versus low responders in the discovery cohort were not measured in the validation cohort.

**Table S1. Characteristics of the discovery and validation cohorts for (A) young and (B) older participants.**

A. Young participants

| <b>Cohort</b> | <b>Gender</b> | <b># Participants</b> | <b>Min Age</b> | <b>Max Age</b> | <b>Median Age</b> |
|---------------|---------------|-----------------------|----------------|----------------|-------------------|
| SDY63         | Female        | 17                    | 21             | 29             | 26                |
| SDY63         | Male          | 5                     | 23             | 27             | 24                |
| SDY80         | Female        | 27                    | 21             | 35             | 23                |
| SDY80         | Male          | 19                    | 21             | 34             | 23                |
| SDY212        | Female        | 14                    | 21             | 30             | 25.5              |
| SDY212        | Male          | 16                    | 21             | 31             | 25                |
| SDY400        | Female        | 28                    | 22             | 30             | 26                |
| SDY400        | Male          | 20                    | 21             | 30             | 26                |
| SDY404        | Female        | 18                    | 22             | 30             | 27                |
| SDY404        | Male          | 14                    | 22             | 30             | 24.5              |

B. Older participants

| <b>Cohort</b> | <b>Gender</b> | <b># Participants</b> | <b>Min Age</b> | <b>Max Age</b> | <b>Median Age</b> |
|---------------|---------------|-----------------------|----------------|----------------|-------------------|
| SDY63         | Female        | 11                    | 71             | 78             | 74                |
| SDY63         | Male          | 9                     | 71             | 79             | 75                |
| SDY67         | Female        | 45                    | 60             | 73             | 67                |
| SDY67         | Male          | 24                    | 60             | 73             | 67                |
| SDY212        | Female        | 40                    | 61             | 90             | 80                |
| SDY212        | Male          | 21                    | 62             | 90             | 78                |
| SDY400        | Female        | 28                    | 65             | 88             | 72                |
| SDY400        | Male          | 17                    | 65             | 85             | 70                |
| SDY404        | Female        | 22                    | 66             | 92             | 75                |
| SDY404        | Male          | 15                    | 69             | 93             | 73                |

**Table S2. Gene module activities that are associated with vaccination response in the discovery cohorts for older participants.**

| Gene Module                                   | Discovery Cohorts |       |                      | Validation Cohort |       |                      |
|-----------------------------------------------|-------------------|-------|----------------------|-------------------|-------|----------------------|
|                                               | P value           | FDR   | Gene Module Activity | P value           | FDR   | Gene Module Activity |
| lysosomal/endosomal proteins (M139)           | 0.008             | 0.473 | -0.145               | 0.955             | 0.963 | 0.010                |
| enriched in antigen presentation (II) (M95.0) | 0.009             | 0.473 | -0.117               | 0.963             | 0.963 | 0.003                |

**Table S3. Validation of gene modules that are associated with vaccination response in KEGG and Reactome and the modules defined in Obermoser *et al.* for young participants.**

| Gene Module                                                                           | P value | FDR   | Gene Module Activity |
|---------------------------------------------------------------------------------------|---------|-------|----------------------|
| REACTOME_INFLAMMASOMES                                                                | 0.000   | 0.001 | -0.014               |
| REACTOME_THE_NLRP3_INFLAMMASOME                                                       | 0.000   | 0.001 | 0.015                |
| REACTOME_PLATELET_SENSITIZATION_BY_LDL                                                | 0.000   | 0.001 | 0.013                |
| Obermoser_M7.1_Inflammation                                                           | 0.000   | 0.002 | 0.081                |
| KEGG_B_CELL_RECEPTOR_SIGNALING_PATHWAY                                                | 0.000   | 0.004 | 0.034                |
| Obermoser_M4.6_Inflammation                                                           | 0.001   | 0.008 | 0.084                |
| Obermoser_M4.13_Inflammation                                                          | 0.001   | 0.008 | 0.108                |
| Obermoser_M4.2_Inflammation                                                           | 0.001   | 0.008 | 0.096                |
| REACTOME_ANTIGEN_ACTIVATES_B_CELL_RECEPTOR_LEADING_TO_GENERATION_OF_SECOND_MESSENGERS | 0.001   | 0.008 | 0.011                |
| Obermoser_M5.7_Inflammation                                                           | 0.001   | 0.009 | 0.066                |
| Obermoser_M3.2_Inflammation                                                           | 0.004   | 0.022 | 0.110                |
| REACTOME_FACTORS_INVOLVED_IN_MEGAKARYOCYTE_DEVELOPMENT_AND_PLATELET_PRODUCTION        | 0.006   | 0.030 | 0.061                |
| REACTOME_SIGNALING_BY_THE_B_CELL_RECEPTOR_BCR                                         | 0.011   | 0.047 | -0.002               |
| Obermoser_M5.1_Inflammation                                                           | 0.013   | 0.052 | 0.059                |
| REACTOME_PLATELET_HOMEOSTASIS                                                         | 0.023   | 0.078 | 0.065                |
| Obermoser_M4.10_B cell                                                                | 0.064   | 0.167 | 0.086                |
| REACTOME_DOWNSTREAM_SIGNALING_EVENTS_OF_B_CELL_RECEPTOR_BCR                           | 0.075   | 0.191 | 0.026                |
| REACTOME_PLATELET_ACTIVATION_SIGNALING_AND_AGGREGATION                                | 0.138   | 0.283 | -0.003               |
| REACTOME_ACTIVATION_OF_NF_KAPPAB_IN_B_CELLS                                           | 0.139   | 0.285 | 0.034                |
| REACTOME_RESPONSE_TO_ELEVATED_PLATELET_CYTOSOLIC_CA2_                                 | 0.167   | 0.319 | 0.017                |
| REACTOME_PLATELET_CALCIUM_HOMEOSTASIS                                                 | 0.252   | 0.420 | 0.085                |
| REACTOME_PLATELET_ADHESION_TO_EXPOSED_COLLAGEN                                        | 0.334   | 0.505 | -0.011               |
| REACTOME_PLATELET_AGGREGATION_PLUG_FORMATION                                          | 0.591   | 0.729 | 0.023                |
| Obermoser_M1.1_Platelets                                                              | 0.952   | 0.965 | 0.043                |
